# Supplementary material for: Post-fragmentation recovery in the soft coral Sinularia flexibilis is enhanced by suspension culture
Source: Research Square preprint supplement (doi:10.21203/rs.3.rs-8552529/v1), 2026-01-27
Supplement: Supplementary file 1 [file 224df89910eb4c4c420626fe.xlsx]

## Sheet: BranchNumber
Culture	Ind_Number	Time	Branches
Suspended	1	0	5
Suspended	2	0	1
Suspended	3	0	1
Suspended	4	0	1
Suspended	5	0	1
Suspended	6	0	1
Suspended	7	0	4
Suspended	8	0	3
Suspended	9	0	3
Suspended	10	0	5
Suspended	11	0	5
Suspended	12	0	1
Suspended	13	0	5
Suspended	14	0	1
Suspended	15	0	1
Suspended	16	0	6
Suspended	1	5	5
Suspended	2	5	1
Suspended	3	5	1
Suspended	4	5	1
Suspended	5	5	1
Suspended	6	5	1
Suspended	7	5	4
Suspended	8	5	3
Suspended	9	5	3
Suspended	10	5	6
Suspended	11	5	5
Suspended	12	5	1
Suspended	13	5	5
Suspended	14	5	1
Suspended	15	5	1
Suspended	16	5	6
Suspended	1	8	5
Suspended	2	8	1
Suspended	3	8	1
Suspended	4	8	2
Suspended	5	8	1
Suspended	6	8	1
Suspended	7	8	4
Suspended	8	8	3
Suspended	9	8	3
Suspended	10	8	6
Suspended	11	8	5
Suspended	12	8	1
Suspended	13	8	5
Suspended	14	8	1
Suspended	15	8	1
Suspended	16	8	9
Suspended	1	13	5
Suspended	2	13	1
Suspended	3	13	1
Suspended	4	13	2
Suspended	5	13	1
Suspended	6	13	1
Suspended	7	13	4
Suspended	8	13	3
Suspended	9	13	3
Suspended	10	13	7
Suspended	11	13	5
Suspended	12	13	1
Suspended	13	13	5
Suspended	14	13	1
Suspended	15	13	1
Suspended	16	13	9
Suspended	1	16	5
Suspended	2	16	1
Suspended	3	16	1
Suspended	4	16	2
Suspended	5	16	1
Suspended	6	16	1
Suspended	7	16	4
Suspended	8	16	3
Suspended	9	16	3
Suspended	10	16	7
Suspended	11	16	5
Suspended	12	16	1
Suspended	13	16	5
Suspended	14	16	1
Suspended	15	16	1
Suspended	16	16	9
Suspended	1	19	5
Suspended	2	19	1
Suspended	3	19	1
Suspended	4	19	2
Suspended	5	19	1
Suspended	6	19	1
Suspended	7	19	4
Suspended	8	19	3
Suspended	9	19	3
Suspended	10	19	7
Suspended	11	19	5
Suspended	12	19	1
Suspended	13	19	5
Suspended	14	19	1
Suspended	15	19	1
Suspended	16	19	9
Suspended	1	23	5
Suspended	2	23	1
Suspended	3	23	1
Suspended	4	23	2
Suspended	5	23	1
Suspended	6	23	1
Suspended	7	23	4
Suspended	8	23	3
Suspended	9	23	3
Suspended	10	23	7
Suspended	11	23	5
Suspended	12	23	1
Suspended	13	23	5
Suspended	14	23	1
Suspended	15	23	1
Suspended	16	23	10
Suspended	1	28	5
Suspended	2	28	1
Suspended	3	28	1
Suspended	4	28	2
Suspended	5	28	1
Suspended	6	28	1
Suspended	7	28	4
Suspended	8	28	3
Suspended	9	28	3
Suspended	10	28	7
Suspended	11	28	5
Suspended	12	28	1
Suspended	13	28	5
Suspended	14	28	1
Suspended	15	28	1
Suspended	16	28	10
Suspended	1	36	5
Suspended	2	36	1
Suspended	3	36	1
Suspended	4	36	2
Suspended	5	36	1
Suspended	6	36	1
Suspended	7	36	4
Suspended	8	36	3
Suspended	9	36	3
Suspended	10	36	7
Suspended	11	36	5
Suspended	12	36	1
Suspended	13	36	5
Suspended	14	36	1
Suspended	15	36	1
Suspended	16	36	10
Bottom	1	0	3
Bottom	2	0	1
Bottom	3	0	1
Bottom	4	0	1
Bottom	5	0	1
Bottom	6	0	4
Bottom	7	0	2
Bottom	8	0	1
Bottom	9	0	3
Bottom	10	0	1
Bottom	11	0	2
Bottom	12	0	3
Bottom	13	0	3
Bottom	14	0	3
Bottom	15	0	3
Bottom	16	0	1
Bottom	1	3	3
Bottom	2	3	1
Bottom	3	3	1
Bottom	4	3	1
Bottom	5	3	1
Bottom	6	3	4
Bottom	7	3	2
Bottom	8	3	1
Bottom	9	3	3
Bottom	10	3	1
Bottom	11	3	2
Bottom	12	3	3
Bottom	13	3	3
Bottom	14	3	3
Bottom	15	3	3
Bottom	16	3	3
Bottom	1	8	3
Bottom	2	8	1
Bottom	3	8	1
Bottom	4	8	1
Bottom	5	8	1
Bottom	6	8	4
Bottom	7	8	2
Bottom	8	8	1
Bottom	9	8	3
Bottom	10	8	1
Bottom	11	8	2
Bottom	12	8	3
Bottom	13	8	3
Bottom	14	8	3
Bottom	15	8	3
Bottom	16	8	3
Bottom	1	11	3
Bottom	2	11	1
Bottom	3	11	1
Bottom	4	11	1
Bottom	5	11	1
Bottom	6	11	4
Bottom	7	11	3
Bottom	8	11	1
Bottom	9	11	3
Bottom	10	11	1
Bottom	11	11	2
Bottom	12	11	3
Bottom	13	11	4
Bottom	14	11	3
Bottom	15	11	3
Bottom	16	11	3
Bottom	1	16	5
Bottom	2	16	1
Bottom	3	16	1
Bottom	4	16	1
Bottom	5	16	1
Bottom	6	16	4
Bottom	7	16	3
Bottom	8	16	1
Bottom	9	16	3
Bottom	10	16	1
Bottom	11	16	2
Bottom	12	16	3
Bottom	13	16	4
Bottom	14	16	3
Bottom	15	16	3
Bottom	16	16	3
Bottom	1	19	5
Bottom	2	19	1
Bottom	3	19	1
Bottom	4	19	1
Bottom	5	19	1
Bottom	6	19	4
Bottom	7	19	3
Bottom	8	19	1
Bottom	9	19	3
Bottom	10	19	1
Bottom	11	19	2
Bottom	12	19	3
Bottom	13	19	4
Bottom	14	19	3
Bottom	15	19	3
Bottom	16	19	4
Bottom	1	22	5
Bottom	2	22	1
Bottom	3	22	1
Bottom	4	22	1
Bottom	5	22	1
Bottom	6	22	4
Bottom	7	22	3
Bottom	8	22	1
Bottom	9	22	3
Bottom	10	22	1
Bottom	11	22	2
Bottom	12	22	3
Bottom	13	22	4
Bottom	14	22	3
Bottom	15	22	3
Bottom	16	22	4
Bottom	1	23	5
Bottom	2	23	1
Bottom	3	23	1
Bottom	4	23	1
Bottom	5	23	1
Bottom	6	23	4
Bottom	7	23	3
Bottom	8	23	1
Bottom	9	23	3
Bottom	10	23	1
Bottom	11	23	2
Bottom	12	23	3
Bottom	13	23	4
Bottom	14	23	3
Bottom	15	23	3
Bottom	16	23	4
Bottom	1	26	5
Bottom	2	26	1
Bottom	3	26	1
Bottom	4	26	1
Bottom	5	26	1
Bottom	6	26	4
Bottom	7	26	3
Bottom	8	26	1
Bottom	9	26	3
Bottom	10	26	1
Bottom	11	26	2
Bottom	12	26	3
Bottom	13	26	4
Bottom	14	26	3
Bottom	15	26	3
Bottom	16	26	4
Bottom	1	31	5
Bottom	2	31	1
Bottom	3	31	2
Bottom	4	31	1
Bottom	5	31	1
Bottom	6	31	4
Bottom	7	31	3
Bottom	8	31	1
Bottom	9	31	3
Bottom	10	31	1
Bottom	11	31	2
Bottom	12	31	3
Bottom	13	31	4
Bottom	14	31	3
Bottom	15	31	3
Bottom	16	31	4
Bottom	1	39	5
Bottom	2	39	1
Bottom	3	39	2
Bottom	4	39	1
Bottom	5	39	1
Bottom	6	39	4
Bottom	7	39	3
Bottom	8	39	1
Bottom	9	39	3
Bottom	10	39	1
Bottom	11	39	2
Bottom	12	39	3
Bottom	13	39	4
Bottom	14	39	3
Bottom	15	39	3
Bottom	16	39	4

## Sheet: HealingRanks
Culture	Ind_Number	Time	Wound Ranking
Suspended	1	0	1
Suspended	2	0	0
Suspended	3	0	0
Suspended	4	0	0
Suspended	5	0	1
Suspended	6	0	1
Suspended	7	0	0
Suspended	8	0	1
Suspended	9	0	0
Suspended	10	0	0
Suspended	11	0	0
Suspended	12	0	0
Suspended	13	0	1
Suspended	14	0	0
Suspended	15	0	0
Suspended	16	0	1
Suspended	1	5	1
Suspended	2	5	0
Suspended	3	5	2
Suspended	4	5	1
Suspended	5	5	2
Suspended	6	5	1
Suspended	7	5	1
Suspended	8	5	1
Suspended	9	5	2
Suspended	10	5	2
Suspended	11	5	1
Suspended	12	5	2
Suspended	13	5	1
Suspended	14	5	2
Suspended	15	5	1
Suspended	16	5	2
Suspended	1	8	3
Suspended	2	8	2
Suspended	3	8	3
Suspended	4	8	3
Suspended	5	8	3
Suspended	6	8	2
Suspended	7	8	2
Suspended	8	8	3
Suspended	9	8	3
Suspended	10	8	3
Suspended	11	8	3
Suspended	12	8	3
Suspended	13	8	2
Suspended	14	8	3
Suspended	15	8	3
Suspended	16	8	3
Suspended	1	13	3
Suspended	2	13	3
Suspended	3	13	3
Suspended	4	13	3
Suspended	5	13	3
Suspended	6	13	3
Suspended	7	13	3
Suspended	8	13	3
Suspended	9	13	3
Suspended	10	13	3
Suspended	11	13	3
Suspended	12	13	3
Suspended	13	13	3
Suspended	14	13	3
Suspended	15	13	3
Suspended	16	13	3
Suspended	1	16	3
Suspended	2	16	3
Suspended	3	16	3
Suspended	4	16	3
Suspended	5	16	4
Suspended	6	16	3
Suspended	7	16	3
Suspended	8	16	3
Suspended	9	16	4
Suspended	10	16	4
Suspended	11	16	4
Suspended	12	16	3
Suspended	13	16	3
Suspended	14	16	3
Suspended	15	16	4
Suspended	16	16	3
Suspended	1	19	4
Suspended	2	19	4
Suspended	3	19	4
Suspended	4	19	4
Suspended	5	19	4
Suspended	6	19	4
Suspended	7	19	4
Suspended	8	19	4
Suspended	9	19	4
Suspended	10	19	4
Suspended	11	19	4
Suspended	12	19	4
Suspended	13	19	4
Suspended	14	19	4
Suspended	15	19	4
Suspended	16	19	4
Suspended	1	23	4
Suspended	2	23	4
Suspended	3	23	4
Suspended	4	23	4
Suspended	5	23	4
Suspended	6	23	4
Suspended	7	23	4
Suspended	8	23	4
Suspended	9	23	4
Suspended	10	23	4
Suspended	11	23	4
Suspended	12	23	4
Suspended	13	23	4
Suspended	14	23	4
Suspended	15	23	4
Suspended	16	23	4
Suspended	1	28	4
Suspended	2	28	4
Suspended	3	28	4
Suspended	4	28	4
Suspended	5	28	4
Suspended	6	28	4
Suspended	7	28	4
Suspended	8	28	4
Suspended	9	28	4
Suspended	10	28	4
Suspended	11	28	4
Suspended	12	28	4
Suspended	13	28	4
Suspended	14	28	4
Suspended	15	28	4
Suspended	16	28	4
Suspended	1	36	4
Suspended	2	36	4
Suspended	3	36	4
Suspended	4	36	4
Suspended	5	36	4
Suspended	6	36	4
Suspended	7	36	4
Suspended	8	36	4
Suspended	9	36	4
Suspended	10	36	4
Suspended	11	36	4
Suspended	12	36	4
Suspended	13	36	4
Suspended	14	36	4
Suspended	15	36	4
Suspended	16	36	4
Bottom	1	0	0
Bottom	2	0	0
Bottom	3	0	0
Bottom	4	0	0
Bottom	5	0	0
Bottom	6	0	0
Bottom	7	0	0
Bottom	8	0	0
Bottom	9	0	0
Bottom	10	0	0
Bottom	11	0	0
Bottom	12	0	0
Bottom	13	0	0
Bottom	14	0	0
Bottom	15	0	0
Bottom	16	0	0
Bottom	1	3	0
Bottom	2	3	0
Bottom	3	3	0
Bottom	4	3	0
Bottom	5	3	0
Bottom	6	3	0
Bottom	7	3	0
Bottom	8	3	0
Bottom	9	3	0
Bottom	10	3	0
Bottom	11	3	0
Bottom	12	3	0
Bottom	13	3	0
Bottom	14	3	0
Bottom	15	3	0
Bottom	16	3	0
Bottom	1	8	0
Bottom	2	8	0
Bottom	3	8	0
Bottom	4	8	0
Bottom	5	8	0
Bottom	6	8	1
Bottom	7	8	0
Bottom	8	8	1
Bottom	9	8	0
Bottom	10	8	0
Bottom	11	8	0
Bottom	12	8	0
Bottom	13	8	0
Bottom	14	8	1
Bottom	15	8	0
Bottom	16	8	0
Bottom	1	11	1
Bottom	2	11	0
Bottom	3	11	0
Bottom	4	11	1
Bottom	5	11	1
Bottom	6	11	2
Bottom	7	11	0
Bottom	8	11	1
Bottom	9	11	1
Bottom	10	11	0
Bottom	11	11	0
Bottom	12	11	1
Bottom	13	11	1
Bottom	14	11	1
Bottom	15	11	1
Bottom	16	11	1
Bottom	1	16	3
Bottom	2	16	2
Bottom	3	16	2
Bottom	4	16	2
Bottom	5	16	3
Bottom	6	16	3
Bottom	7	16	2
Bottom	8	16	3
Bottom	9	16	2
Bottom	10	16	2
Bottom	11	16	3
Bottom	12	16	3
Bottom	13	16	3
Bottom	14	16	3
Bottom	15	16	3
Bottom	16	16	3
Bottom	1	19	3
Bottom	2	19	3
Bottom	3	19	3
Bottom	4	19	3
Bottom	5	19	3
Bottom	6	19	4
Bottom	7	19	3
Bottom	8	19	3
Bottom	9	19	3
Bottom	10	19	3
Bottom	11	19	3
Bottom	12	19	3
Bottom	13	19	3
Bottom	14	19	3
Bottom	15	19	3
Bottom	16	19	3
Bottom	1	22	3
Bottom	2	22	3
Bottom	3	22	3
Bottom	4	22	3
Bottom	5	22	3
Bottom	6	22	4
Bottom	7	22	3
Bottom	8	22	3
Bottom	9	22	3
Bottom	10	22	3
Bottom	11	22	3
Bottom	12	22	3
Bottom	13	22	3
Bottom	14	22	3
Bottom	15	22	3
Bottom	16	22	3
Bottom	1	23	3
Bottom	2	23	3
Bottom	3	23	3
Bottom	4	23	3
Bottom	5	23	3
Bottom	6	23	4
Bottom	7	23	3
Bottom	8	23	3
Bottom	9	23	3
Bottom	10	23	3
Bottom	11	23	3
Bottom	12	23	3
Bottom	13	23	3
Bottom	14	23	3
Bottom	15	23	3
Bottom	16	23	3
Bottom	1	26	3
Bottom	2	26	3
Bottom	3	26	3
Bottom	4	26	3
Bottom	5	26	3
Bottom	6	26	4
Bottom	7	26	3
Bottom	8	26	3
Bottom	9	26	3
Bottom	10	26	3
Bottom	11	26	3
Bottom	12	26	3
Bottom	13	26	3
Bottom	14	26	3
Bottom	15	26	3
Bottom	16	26	3
Bottom	1	31	3
Bottom	2	31	3
Bottom	3	31	3
Bottom	4	31	3
Bottom	5	31	3
Bottom	6	31	4
Bottom	7	31	3
Bottom	8	31	3
Bottom	9	31	4
Bottom	10	31	3
Bottom	11	31	3
Bottom	12	31	4
Bottom	13	31	3
Bottom	14	31	3
Bottom	15	31	3
Bottom	16	31	4
Bottom	1	39	3
Bottom	2	39	3
Bottom	3	39	3
Bottom	4	39	3
Bottom	5	39	3
Bottom	6	39	4
Bottom	7	39	3
Bottom	8	39	3
Bottom	9	39	4
Bottom	10	39	3
Bottom	11	39	3
Bottom	12	39	4
Bottom	13	39	3
Bottom	14	39	3
Bottom	15	39	3
Bottom	16	39	4

## Sheet: Growth
Culture	Number	Time	Main_Branch_Length	Main_Branch_Base Width	LengthXBaseWidth	Main_Branch_Volume	LengthSm	AreaSm	VolumeSm	Total_Length	Total_LengthXBaseWidth	Total_Volume
Suspended	1	0	26.06	7.16	186.59	514.522	11.23	40.3147	83.4051	37.29	226.904	597.927
Suspended	2	0	21.19	3.55	75.2245	153.819	0	0	0	21.19	75.2245	153.819
Suspended	3	0	26.42	4.82	127.344	287.269	0	0	0	26.42	127.344	287.269
Suspended	4	0	35.82	4.88	174.802	396.341	0	0	0	35.82	174.802	396.341
Suspended	5	0	37.97	3.87	146.944	307.181	0	0	0	37.97	146.944	307.181
Suspended	6	0	38.41	4.34	166.699	361.358	0	0	0	38.41	166.699	361.358
Suspended	7	0	61.06	7.51	458.561	1301.62	25.27	106.698	232.602	86.33	565.259	1534.22
Suspended	8	0	27.99	4.97	139.11	317.848	20.02	66.2584	134.492	48.01	205.369	452.34
Suspended	9	0	41.63	4.66	193.996	431.759	12.78	45.0812	92.0614	54.41	239.077	523.82
Suspended	10	0	52.75	5.21	274.827	641.044	19.34	52.6314	104.518	72.09	327.459	745.562
Suspended	11	0	66.62	5.18	345.092	802.855	30.13	80.1027	157.848	96.75	425.194	960.703
Suspended	12	0	44.69	4.17	186.357	398.541	0	0	0	44.69	186.357	398.541
Suspended	13	0	53.56	5.19	277.976	647.27	18.54	57.5088	115.226	72.1	335.485	762.496
Suspended	14	0	26.04	3.75	97.65	202.387	0	0	0	26.04	97.65	202.387
Suspended	15	0	38.46	3.79	145.763	302.961	0	0	0	38.46	145.763	302.961
Suspended	16	0	46.52	7.04	327.501	894.073	22.31	70.7895	143.839	68.83	398.29	1037.91
Suspended	1	5	21.97	5.02	110.289	253.079	0	0	0	21.97	110.289	253.079
Suspended	2	5	19.23	2.97	57.1131	113.253	0	0	0	19.23	57.1131	113.253
Suspended	3	5	33.93	5.38	182.543	432.101	0	0	0	33.93	182.543	432.101
Suspended	4	5	34.71	5.25	182.227	426.524	0	0	0	34.71	182.227	426.524
Suspended	5	5	41.79	3.75	156.713	324.799	0	0	0	41.79	156.713	324.799
Suspended	6	5	35.91	4.63	166.263	369.11	0	0	0	35.91	166.263	369.11
Suspended	7	5	79.13	6.1	482.693	1216.25	26.78	112.707	243.304	105.91	595.4	1459.55
Suspended	8	5	22.28	5.18	115.41	268.502	16.52	56.0978	114.429	38.8	171.508	382.931
Suspended	9	5	47.84	5.38	257.379	609.246	14.38	67.4728	150.843	62.22	324.852	760.089
Suspended	10	5	57.99	6.3	365.337	936.562	13.53	38.0419	75.3038	71.52	403.379	1011.87
Suspended	11	5	68.12	6.36	433.243	1116.39	15.33	45.749	90.8208	83.45	478.992	1207.21
Suspended	12	5	54.02	4.78	258.216	580.523	0	0	0	54.02	258.216	580.523
Suspended	13	5	70	6.79	475.3	1270.52	18.2	62.2924	127	88.2	537.592	1397.52
Suspended	14	5	28.08	5.1	143.208	330.883	0	0	0	28.08	143.208	330.883
Suspended	15	5	45.73	4.63	211.73	470.047	0	0	0	45.73	211.73	470.047
Suspended	16	5	66.34	8.22	545.315	1638.97	40.44	137.108	278.526	106.78	682.423	1917.49
Suspended	1	8	25.52	5.6	142.912	344.813	0	0	0	25.52	142.912	344.813
Suspended	2	8	29.55	4.14	122.337	261.015	0	0	0	29.55	122.337	261.015
Suspended	3	8	41.44	5.94	246.154	611.704	0	0	0	41.44	246.154	611.704
Suspended	4	8	44.02	4.74	208.655	467.518	2.38	6.902	13.6517	46.4	215.557	481.169
Suspended	5	8	37.47	4.12	154.376	328.862	0	0	0	37.47	154.376	328.862
Suspended	6	8	33.15	4.33	143.54	310.903	0	0	0	33.15	143.54	310.903
Suspended	7	8	81.23	6.41	520.684	1347.48	35.65	175.863	403.287	116.88	696.547	1750.76
Suspended	8	8	32.25	5.51	177.697	425.403	20.07	82.4877	175.584	52.32	260.185	600.987
Suspended	9	8	51.07	5.36	273.735	646.84	18.94	89.9214	201.947	70.01	363.657	848.787
Suspended	10	8	62.52	5.49	343.235	820.269	16.92	48.8196	96.8822	79.44	392.054	917.151
Suspended	11	8	55.5	5.72	317.46	773.983	0	0	0	55.5	317.46	773.983
Suspended	12	8	51.87	4.84	251.051	567.293	0	0	0	51.87	251.051	567.293
Suspended	13	8	69.64	6.94	483.302	1308.37	7.18	23.6222	47.5552	76.82	506.924	1355.93
Suspended	14	8	30.12	6.45	194.274	504.488	0	0	0	30.12	194.274	504.488
Suspended	15	8	59.65	5.77	344.18	842.781	0	0	0	59.65	344.18	842.781
Suspended	16	8	75.72	7.89	597.431	1748.97	24.17	92.4787	194.281	99.89	689.909	1943.25
Suspended	1	13	42	6.3	264.6	678.317	5.91	19.2075	38.5842	47.91	283.807	716.901
Suspended	2	13	33.46	3.92	131.163	275.202	0	0	0	33.46	131.163	275.202
Suspended	3	13	34.37	5.78	198.659	486.87	0	0	0	34.37	198.659	486.87
Suspended	4	13	34.42	5	172.1	394.237	0	0	0	34.42	172.1	394.237
Suspended	5	13	41.31	4.63	191.265	424.615	0	0	0	41.31	191.265	424.615
Suspended	6	13	40.48	6.26	253.405	647.384	0	0	0	40.48	253.405	647.384
Suspended	7	13	71.21	7.93	564.695	1658.46	31.68	134.712	291.986	102.89	699.407	1950.44
Suspended	8	13	40.94	7.23	295.996	820.981	22.62	92.742	197.259	63.56	388.738	1018.24
Suspended	9	13	55.37	5.24	290.139	678.515	12.77	56.188	122.394	68.14	346.327	800.909
Suspended	10	13	74.88	5.83	436.55	1074.55	26.6	76.4848	157.079	101.48	513.035	1231.63
Suspended	11	13	76.74	6.62	508.019	1338.52	40.18	153.82	322.009	116.92	661.838	1660.53
Suspended	12	13	47.11	4.4	207.284	451.525	0	0	0	47.11	207.284	451.525
Suspended	13	13	58.93	6.67	393.063	1040.05	12.94	43.9537	89.3088	71.87	437.017	1129.36
Suspended	14	13	32.67	5.33	174.131	410.406	0	0	0	32.67	174.131	410.406
Suspended	15	13	48.4	6.14	297.176	751.391	0	0	0	48.4	297.176	751.391
Suspended	16	13		7.46			23.1	90.5836	190.99
Suspended	1	16	45.67	5.86	267.626	660.466	0	0	0	45.67	267.626	660.466
Suspended	2	16	29.76	3.62	107.731	221.303	0	0	0	29.76	107.731	221.303
Suspended	3	16	41.21	6.05	249.321	625.505	0	0	0	41.21	249.321	625.505
Suspended	4	16	34.99	4.4	153.956	335.361	0	0	0	34.99	153.956	335.361
Suspended	5	16	52.39	6.68	349.965	926.801	0	0	0	52.39	349.965	926.801
Suspended	6	16	36.48	6.54	238.579	624.328	0	0	0	36.48	238.579	624.328
Suspended	7	16	89.7	6.24	559.728	1427.5	42.44	207.371	474.686	132.14	767.099	1902.19
Suspended	8	16	24.16	4.66	112.586	250.572	11.76	32.1048	63.2005	35.92	144.69	313.772
Suspended	9	16	58.74	5.31	311.909	733.86	14.22	51.4764	105.744	72.96	363.386	839.603
Suspended	10	16	74.78	5.48	409.794	978.484	18.5	44.4306	87.7731	93.28	454.225	1066.26
Suspended	11	16	69.96	6.55	458.238	1200.17	14.35	62.566	135.845	84.31	520.804	1336.01
Suspended	12	16	43.1	4.52	194.812	428.554	0	0	0	43.1	194.812	428.554
Suspended	13	16	59.32	6.84	405.749	1089.2	11.79	44.397	92.2444	71.11	450.146	1181.45
Suspended	14	16	30.94	5.62	173.883	420.267	0	0	0	30.94	173.883	420.267
Suspended	15	16	49.12	6.1	299.632	754.986	0	0	0	49.12	299.632	754.986
Suspended	16	16	65.23	7.91	515.969	1512.92	12.26	52.2276	112.491	77.49	568.197	1625.41
Suspended	1	19	47.05	5.75	270.537	661.304	0	0	0	47.05	270.537	661.304
Suspended	2	19	31.68	4.62	146.362	324.656	0	0	0	31.68	146.362	324.656
Suspended	3	19	39.52	6.62	261.622	689.317	0	0	0	39.52	261.622	689.317
Suspended	4	19	46.29	4.94	228.673	521.147	3.52	8.8352	17.348	49.81	237.508	538.495
Suspended	5	19	42.66	5.12	218.419	505.529	0	0	0	42.66	218.419	505.529
Suspended	6	19
Suspended	7	19	77.05	8.7	670.335	2091.6	29.2	140.452	316.569	106.25	810.787	2408.17
Suspended	8	19	38.45	5.42	208.399	495.019	24.86	95.689	200.663	63.31	304.088	695.682
Suspended	9	19	62.96	5.67	356.983	866.57	20.97	86.8173	185.276	83.93	443.8	1051.85
Suspended	10	19	73.02	7.16	522.823	1441.69	23.75	62.0998	122.043	96.77	584.923	1563.73
Suspended	11	19	82.55	7.94	655.447	1926.53	50.25	181.386	375.293	132.8	836.833	2301.82
Suspended	12	19	45.63	6.2	282.906	719.024	0	0	0	45.63	282.906	719.024
Suspended	13	19	78.59	6.69	525.767	1393.55	7.54	24.8066	49.9396	86.13	550.574	1443.49
Suspended	14	19	37.22	6.32	235.23	604.065	0	0	0	37.22	235.23	604.065
Suspended	15	19	68.86	7.21	496.481	1374.76	0	0	0	68.86	496.481	1374.76
Suspended	16	19	83.54	9.77	816.186	2758.51	0	0	0	83.54	816.186	2758.51
Suspended	1	23	48.33	7.61	367.791	1052.55	0	0	0	48.33	367.791	1052.55
Suspended	2	23	37.23	5.6	208.488	503.032	0	0	0	37.23	208.488	503.032
Suspended	3	23	43.1	5.56	239.636	576.179	0	0	0	43.1	239.636	576.179
Suspended	4	23	51.76	6.43	332.817	862.774	0	0	0	51.76	332.817	862.774
Suspended	5	23	38.89	4.63	180.061	399.74	0	0	0	38.89	180.061	399.74
Suspended	6	23	53.52	7.05	377.316	1030.93	0	0	0	53.52	377.316	1030.93
Suspended	7	23	102.5	9.05	927.625	2972.65	41.73	177.359	382.198	144.23	1104.98	3354.85
Suspended	8	23	40.94	6.12	250.553	632.413	31.84	130.118	276.526	72.78	380.671	908.939
Suspended	9	23	60.6	5.08	307.848	710.062	25.02	98.6895	207.822	85.62	406.538	917.885
Suspended	10	23	70.32	7.93	557.638	1637.73	0	0	0	70.32	557.638	1637.73
Suspended	11	23	96.96	8.07	782.467	2323.91	55.85	211.88	443.17	152.81	994.347	2767.08
Suspended	12	23	62.56	5.61	350.962	847.523	0	0	0	62.56	350.962	847.523
Suspended	13	23	76.34	8.19	625.225	1874.69	26.21	95.3865	197.396	102.55	720.611	2072.08
Suspended	14	23	38.47	6.38	245.439	633.537	0	0	0	38.47	245.439	633.537
Suspended	15	23	67.32	5.5	370.26	885.623	0	0	0	67.32	370.26	885.623
Suspended	16	23	92.72	9.67	896.602	3008.38	41.87	146.977	301.974	134.59	1043.58	3310.35
Suspended	1	28	50.6	9.38	474.628	1558.97	9.38	31.0478	62.5734	59.98	505.676	1621.54
Suspended	2	28	39.57	5.49	217.239	519.162	0	0	0	39.57	217.239	519.162
Suspended	3	28	45.26	6.91	312.747	844.518	0	0	0	45.26	312.747	844.518
Suspended	4	28	47.72	5.46	260.551	621.05	6.43	21.6048	43.6659	54.15	282.156	664.716
Suspended	5	28	41.99	6.06	254.459	638.95	0	0	0	41.99	254.459	638.95
Suspended	6	28	51.72	6.62	342.386	902.112	0	0	0	51.72	342.386	902.112
Suspended	7	28	87.86	8.09	710.787	2114.39	45.34	195.306	425.568	133.2	906.094	2539.95
Suspended	8	28	37.34	6.17	230.388	584.032	24.04	98.0832	208.297	61.38	328.471	792.329
Suspended	9	28	56.02	6.11	342.282	863.198	25.21	103.528	220.315	81.23	445.81	1083.51
Suspended	10	28	68.69	7.76	533.034	1544.16	17.49	71.3592	151.544	86.18	604.394	1695.7
Suspended	11	28	88.88	7.51	667.489	1894.66	55.39	189.602	390.094	144.27	857.091	2284.75
Suspended	12	28	57.27	6.64	380.273	1003.64	0	0	0	57.27	380.273	1003.64
Suspended	13	28	71.03	9.79	695.384	2353.63	8.07	30.3432	62.9329	79.1	725.727	2416.56
Suspended	14	28	38.72	6.52	252.454	659.509	0	0	0	38.72	252.454	659.509
Suspended	15	28	69.86	6.44	449.898	1167.29	0	0	0	69.86	449.898	1167.29
Suspended	16	28	94.08	8.64	812.851	2524.57	18.17	64.3218	131.441	112.25	877.173	2656.01
Suspended	1	36	33.71	7.18	242.038	668.534	8.75	32.9875	68.4655	42.46	275.025	737
Suspended	2	36	34.95	4.34	151.683	328.807	0	0	0	34.95	151.683	328.807
Suspended	3	36	52.02	8.79	457.256	1436.64	0	0	0	52.02	457.256	1436.64
Suspended	4	36	46.09	6.52	300.507	785.041	6.94	24.8452	50.9027	53.03	325.352	835.943
Suspended	5	36	46.3	5.69	263.447	640.625	0	0	0	46.3	263.447	640.625
Suspended	6	36	42.52	6.44	273.829	710.466	0	0	0	42.52	273.829	710.466
Suspended	7	36	93.68	8.49	795.343	2441.63	46.02	212.054	476.656	139.7	1007.4	2918.28
Suspended	8	36	41.19	7.31	301.099	840.695	0	0	0	41.19	301.099	840.695
Suspended	9	36	62.42	5.77	360.163	881.917	26.83	119.03	261.242	89.25	479.194	1143.16
Suspended	10	36	78.03	5.77	450.233	1102.47	22.71	61.7498	123.093	100.74	511.983	1225.56
Suspended	11	36
Suspended	12	36
Suspended	13	36	78.38	6.09	477.334	1201.71	22.96	83.4786	172.845	101.34	560.813	1374.55
Suspended	14	36	40.72	6.53	265.902	695.232	0	0	0	40.72	265.902	695.232
Suspended	15	36	57.07	6.71	382.94	1016.71	0	0	0	57.07	382.94	1016.71
Suspended	16	36
Bottom	1	0	10.6	3.09	32.754	65.2783	6.04	12.6236	25.2244	16.64	45.3776	90.5027
Bottom	2	0	21.51	3.47	74.6397	151.853	0	0	0	21.51	74.6397	151.853
Bottom	3	0	53.61	3.35	179.594	362.771	0	0	0	53.61	179.594	362.771
Bottom	4	0	53.55	3.74	200.277	414.799	0	0	0	53.55	200.277	414.799
Bottom	5	0	53.07	4.02	213.341	450.995	0	0	0	53.07	213.341	450.995
Bottom	6	0	28.46	5.34	151.976	358.5	9.62	19.0517	38.0957	38.08	171.028	396.596
Bottom	7	0	27.82	10.3	286.546	1005.75	7.14	17.9214	35.1888	34.96	304.467	1040.93
Bottom	8	0	30.9	3.4	105.06	212.837	0	0	0	30.9	105.06	212.837
Bottom	9	0	60.33	3.8	229.254	476.832	13.31	28.1161	55.8522	73.64	257.37	532.684
Bottom	10	0	74.29	3.49	259.272	528.142	0	0	0	74.29	259.272	528.142
Bottom	11	0	71.76	3.03	217.433	432.205	14.55	42.0495	83.1434	86.31	259.482	515.349
Bottom	12	0	30.56	4.44	135.686	296.531	6.93	23.8754	49.4149	37.49	159.562	345.946
Bottom	13	0	78.14	5.22	407.891	952.241	3.05	8.479	16.7111	81.19	416.37	968.952
Bottom	14	0	63.41	4.75	301.197	675.441	18.44	54.3232	107.628	81.85	355.521	783.069
Bottom	15	0	61.05	4.01	244.81	517.127	13.9	46.9905	95.5153	74.95	291.801	612.642
Bottom	16	0	66.29	4.03	267.149	565.171	0	0	0	66.29	267.149	565.171
Bottom	1	3	13.7	3.12	42.744	85.3064	11.65	26.001	51.3354	25.35	68.745	136.642
Bottom	2	3	24.97	4.36	108.869	236.38	0	0	0	24.97	108.869	236.38
Bottom	3	3	29.7	3.24	96.228	193.201	0	0	0	29.7	96.228	193.201
Bottom	4	3	49.14	4.05	199.017	421.677	0	0	0	49.14	199.017	421.677
Bottom	5	3	45.5	5.37	244.335	577.868	0	0	0	45.5	244.335	577.868
Bottom	6	3	37.43	5.8	217.094	532.976	14.9	34.971	69.0055	52.33	252.065	601.981
Bottom	7	3	31.52	11.5	362.48	1380.13	8.44	23.7164	46.7794	39.96	386.196	1426.91
Bottom	8	3	16.01	3.04	48.6704	96.7863	0	0	0	16.01	48.6704	96.7863
Bottom	9	3	53.84	4.85	261.124	590.557	12.28	39.296	78.7328	66.12	300.42	669.29
Bottom	10	3	62.28	3.56	221.717	453.66	0	0	0	62.28	221.717	453.66
Bottom	11	3	68.89	4.67	321.716	716.615	12.28	39.296	78.7328	81.17	361.012	795.348
Bottom	12	3	41.65	4.48	186.592	409.12	12.51	36.0963	72.0048	54.16	222.688	481.125
Bottom	13	3	71.23	4.25	302.728	651.513	16.84	44.055	86.992	88.07	346.783	738.505
Bottom	14	3	47.06	4.5	211.77	465.091	12.43	37.3834	74.3999	59.49	249.153	539.49
Bottom	15	3	61.63	5.95	366.699	912.054	14.28	47.7828	96.5542	75.91	414.481	1008.61
Bottom	16	3	65.46	5.43	355.448	845.043	8.41	23.7468	46.8664	73.87	379.195	891.909
Bottom	1	8	16.8	3.15	52.92	105.766	15.04	40.1504	79.1967	31.84	93.0704	184.963
Bottom	2	8	28.43	5.25	149.257	349.354	0	0	0	28.43	149.257	349.354
Bottom	3	8	63.75	3.8	242.25	503.862	0	0	0	63.75	242.25	503.862
Bottom	4	8	56.01	4.32	241.963	523.665	0	0	0	56.01	241.963	523.665
Bottom	5	8	60.19	5.39	324.424	768.615	0	0	0	60.19	324.424	768.615
Bottom	6	8	46.4	5.34	247.776	584.484	18.51	50.2134	99.1007	64.91	297.989	683.585
Bottom	7	8	35.22	12.7	447.294	1837.57	19.93	61.1851	121.832	55.15	508.479	1959.4
Bottom	8	8	38.04	4.52	171.941	378.241	0	0	0	38.04	171.941	378.241
Bottom	9	8	43.66	5.52	241.003	577.456	14.29	42.4413	84.1597	57.95	283.444	661.616
Bottom	10	8	84.06	4.21	353.893	759.217	0	0	0	84.06	353.893	759.217
Bottom	11	8	72.1	5.7	410.97	1000.23	14.29	42.4413	84.1597	86.39	453.411	1084.38
Bottom	12	8	52.74	4.52	238.385	524.407	12.78	0	0	65.52	238.385	524.407
Bottom	13	8	74.55	4.45	331.748	725.599	20.43	53.7309	105.591	94.98	385.478	831.189
Bottom	14	8	71.78	4.5	323.01	709.396	23.44	86.9212	181.343	95.22	409.931	890.739
Bottom	15	8	67.57	5.72	386.5	942.307	13.91	47.7802	98.9268	81.48	434.281	1041.23
Bottom	16	8	69.9	5.41	378.159	897.478	10.62	29.2029	57.5138	80.52	407.362	954.992
Bottom	1	11	19.49	4.34	84.5866	183.36	19.83	54.8898	108.804	39.32	139.476	292.164
Bottom	2	11	28.93	4.93	142.625	324.766	0	0	0	28.93	142.625	324.766
Bottom	3	11	57.68	3.88	223.798	468.185	0	0	0	57.68	223.798	468.185
Bottom	4	11	59.11	4.78	282.546	635.222	0	0	0	59.11	282.546	635.222
Bottom	5	11	48.14	5.37	258.512	611.397	0	0	0	48.14	258.512	611.397
Bottom	6	11	52.05	6.47	336.763	876.002	21.84	59.673	117.512	73.89	396.436	993.514
Bottom	7	11	43.15	9.33	402.589	1317.46	20.45	71.3799	145.952	63.6	473.969	1463.41
Bottom	8	11	41.05	4.39	180.209	392.229	0	0	0	41.05	180.209	392.229
Bottom	9	11	71.78	4.55	326.599	720.249	8.51	25.625	52.5855	80.29	352.224	772.834
Bottom	10	11	92.21	4.14	381.749	814.492	0	0	0	92.21	381.749	814.492
Bottom	11	11	69.54	5.12	356.045	824.062	13.67	45.7945	92.503	83.21	401.839	916.565
Bottom	12	11	54.94	4.67	256.57	571.503	19.98	55.3723	109.813	74.92	311.942	681.316
Bottom	13	11	78.05	5.32	415.226	977.789	18.18	45.2762	89.5226	96.23	460.502	1067.31
Bottom	14	11	70.65	6.46	456.399	1186.19	21.43	73.4855	150.69	92.08	529.885	1336.88
Bottom	15	11	68.98	6.14	423.537	1070.89	11.9	34.867	69.0372	80.88	458.404	1139.92
Bottom	16	11	79.61	5.59	445.02	1072.79
Bottom	1	16	22.5	4.41	99.225	216.317	16.8	53.3511	108.918	39.3	152.576	325.235
Bottom	2	16	30.16	5.47	164.975	393.577	0	0	0	30.16	164.975	393.577
Bottom	3	16	63.9	4.85	309.915	700.902	0	0	0	63.9	309.915	700.902
Bottom	4	16	65.98	5.26	347.055	813.023	0	0	0	65.98	347.055	813.023
Bottom	5	16	65.69	6.61	434.211	1143.07	0	0	0	65.69	434.211	1143.07
Bottom	6	16	50.34	6.9	347.346	937.157	16.8	40.152	78.8915	67.14	387.498	1016.05
Bottom	7	16	46.19	11.5	531.185	2022.47	22.81	86.194	181.652	69	617.379	2204.12
Bottom	8	16	42.88	4.55	195.104	430.263	0	0	0	42.88	195.104	430.263
Bottom	9	16	77.48	5.68	440.086	1069.23	19.41	53.9959	106.627	96.89	494.082	1175.86
Bottom	10	16	83.84	4.75	398.24	893.061	0	0	0	83.84	398.24	893.061
Bottom	11	16	84.38	5.91	498.686	1236.04	16.38	51.597	103.122	100.76	550.283	1339.16
Bottom	12	16	59.25	4.98	295.065	674.761	18.91	54.1576	107.879	78.16	349.223	782.641
Bottom	13	16	73.2	5.94	434.808	1080.52	22.13	51.4072	101.203	95.33	486.215	1181.72
Bottom	14	16	77.32	5.18	400.518	931.803	28.56	126.7	279.286	105.88	527.218	1211.09
Bottom	15	16	68.78	7.12	489.714	1345.89	18.89	67.8312	139.713	87.67	557.545	1485.6
Bottom	16	16	82.21	6.19	508.88	1292.24	12.35	32.5416	63.9665	94.56	541.422	1356.2
Bottom	1	19	21.7	4.9	106.33	241.501	16.54	48.5242	97.7184	38.24	154.854	339.22
Bottom	2	19	29.41	5.76	169.402	414.447	0	0	0	29.41	169.402	414.447
Bottom	3	19	64.65	4.59	296.744	656.586	0	0	0	64.65	296.744	656.586
Bottom	4	19	63.98	5.78	369.804	906.312	0	0	0	63.98	369.804	906.312
Bottom	5	19	62.92	7.5	471.9	1338.38	0	0	0	62.92	471.9	1338.38
Bottom	6	19	45.11	7.1	320.281	878.765	22.24	52.6054	103.62	67.35	372.886	982.385
Bottom	7	19	48.9	13.51	660.639	2849.02	25.46	84.5272	170.451	74.36	745.166	3019.47
Bottom	8	19	44.8	5.04	225.792	519.01	0	0	0	44.8	225.792	519.01
Bottom	9	19	67.1	5.98	401.258	1000.61	9.49	28.47	56.5218	76.59	429.728	1057.13
Bottom	10	19	75.65	4.72	357.068	798.709	0	0	0	75.65	357.068	798.709
Bottom	11	19	78.19	6.04	472.268	1183.82	13.82	39.5252	78.0765	92.01	511.793	1261.89
Bottom	12	19	49.79	4.98	247.954	567.027	11.55	38.346	77.3254	61.34	286.3	644.353
Bottom	13	19	84.77	5.36	454.367	1073.68	9.24	24.486	48.1326	94.01	478.853	1121.81
Bottom	14	19	79.11	5.22	412.954	964.062	29.78	123.655	266.745	108.89	536.609	1230.81
Bottom	15	19	70.37	7.59	534.108	1526.02	14.29	43.2987	86.0677	84.66	577.407	1612.09
Bottom	16	19	75.7	6.19	468.583	1189.91	7	15.1704	29.9976	82.7	483.753	1219.9
Bottom	1	22	20.43	4.55	92.9565	204.997	14.04	44.298	89.4981	34.47	137.255	294.495
Bottom	2	22	29.46	5.66	166.744	404.415	0	0	0	29.46	166.744	404.415
Bottom	3	22	60.91	5.16	314.296	729.947	0	0	0	60.91	314.296	729.947
Bottom	4	22	66.18	5.19	343.474	799.782	0	0	0	66.18	343.474	799.782
Bottom	5	22	65.42	6.82	446.164	1195.67	0	0	0	65.42	446.164	1195.67
Bottom	6	22	49.71	7.02	348.964	951.072	20.09	41.3063	82.1743	69.8	390.271	1033.25
Bottom	7	22	48.68	12.68	617.262	2532.72	25.14	94.275	195.392	73.82	711.537	2728.12
Bottom	8	22
Bottom	9	22	75.13	6.08	456.79	1148.99	9.78	29.1444	57.8148	84.91	485.935	1206.81
Bottom	10	22	86.49	4.49	388.34	852.173	0	0	0	86.49	388.34	852.173
Bottom	11	22	92.41	6.25	577.562	1474.25	17.22	57.5148	116.111	109.63	635.077	1590.36
Bottom	12	22	57.87	5.21	301.503	703.265	14.49	49.8456	101.224	72.36	351.348	804.488
Bottom	13	22	84.54	5.58	471.733	1136.2	10.31	27.2184	53.4961	94.85	498.952	1189.7
Bottom	14	22	74.85	5.94	444.609	1104.88	20.54	78.8736	164.524	95.39	523.483	1269.4
Bottom	15	22	72.9	6.42	468.018	1212.22	18.73	81.6628	177.309	91.63	549.681	1389.53
Bottom	16	22	80.58	5.76	464.141	1135.54
Bottom	1	23	21.86	4.23	92.4678	198.688	20.15	58.7042	117.319	42.01	151.172	316.007
Bottom	2	23	34.06	6.27	213.556	546.051	0	0	0	34.06	213.556	546.051
Bottom	3	23	71.55	4.83	345.587	780.25	0	0	0	71.55	345.587	780.25
Bottom	4	23	71.06	6.23	442.704	1128.08	0	0	0	71.06	442.704	1128.08
Bottom	5	23	77.34	6.78	524.365	1400.49	0	0	0	77.34	524.365	1400.49
Bottom	6	23	60.13	7.73	464.805	1343.23	24.06	73.5684	146.42	84.19	538.373	1489.65
Bottom	7	23	52.83	13.23	698.941	2964.75	26.42	95.3762	195.793	79.25	794.317	3160.55
Bottom	8	23	45.39	4.78	216.964	487.781	0	0	0	45.39	216.964	487.781
Bottom	9	23	85.64	6.55	560.942	1469.16	10.25	33.7225	67.8887	95.89	594.664	1537.05
Bottom	10	23	96.94	5.22	506.027	1181.34	0	0	0	96.94	506.027	1181.34
Bottom	11	23	91.56	7.32	670.219	1872.86	19.68	62.976	126.178	111.24	733.195	1999.04
Bottom	12	23	66.83	6.02	402.317	1006.73	17.1	59.679	121.567	83.93	461.996	1128.3
Bottom	13	23	93.17	5.9	549.703	1361.31	10.05	29.8485	59.1886	103.22	579.552	1420.5
Bottom	14	23	89.34	6.17	551.228	1397.36	24.35	138.308	336.032	113.69	689.536	1733.39
Bottom	15	23	85.32	7.04	600.653	1639.77	15.39	67.8699	147.961	100.71	668.523	1787.74
Bottom	16	23	88.07	6.77	596.234	1591.09	5.16	16.5636	33.2035	93.23	612.797	1624.3
Bottom	1	26	21.6	5.27	113.832	266.898	16.72	56.9724	116.716	38.32	170.804	383.614
Bottom	2	26	34.14	6.91	235.907	637.027	0	0	0	34.14	235.907	637.027
Bottom	3	26	66.33	5.63	373.438	903.368	0	0	0	66.33	373.438	903.368
Bottom	4	26	71.86	5.94	426.848	1060.74	0	0	0	71.86	426.848	1060.74
Bottom	5	26	73.71	7.61	560.933	1605.28	0	0	0	73.71	560.933	1605.28
Bottom	6	26	60.52	7.54	456.321	1298.45	13.48	44.5228	89.7528	74	500.844	1388.2
Bottom	7	26	54.16	14.04	760.406	3381.3	25.59	106.71	228.209	79.75	867.117	3609.51
Bottom	8	26	46.31	5.73	265.356	647.514	0	0	0	46.31	265.356	647.514
Bottom	9	26	77.9	6.91	538.289	1453.56	8.02	26.9472	54.4636	85.92	565.236	1508.02
Bottom	10	26	92.6	5.53	512.078	1228.03	0	0	0	92.6	512.078	1228.03
Bottom	11	26	99.77	7.89	787.185	2304.47	20.88	73.08	148.959	120.65	860.265	2453.43
Bottom	12	26	62.87	6	377.22	942.297	14.17	50.5869	103.574	77.04	427.807	1045.87
Bottom	13	26	92.83	6.48	601.538	1566.08	13.03	33.7477	66.2911	105.86	635.286	1632.38
Bottom	14	26					0	0	0
Bottom	15	26	84.74	9.03	765.202	2448.45	19.43	79.8573	169.985	104.17	845.059	2618.44
Bottom	16	26	87.55	7.3	639.115	1782.99	3.82	13.2172	26.8736	91.37	652.332	1809.86
Bottom	1	31	22.21	5.36	119.046	281.306	27.77	91.7907	185.733	49.98	210.836	467.04
Bottom	2	31	35.18	6.9	242.742	654.93	0	0	0	35.18	242.742	654.93
Bottom	3	31	75.22	4.97	373.843	854.182	2.88	9.4464	19.0067	78.1	383.29	873.189
Bottom	4	31	75.26	6.74	507.252	1350.2	0	0	0	75.26	507.252	1350.2
Bottom	5	31	85.39	7.11	607.123	1667.17	0	0	0	85.39	607.123	1667.17
Bottom	6	31	64.65	8.02	518.493	1533.78	18.36	69.7932	147.361	83.01	588.286	1681.14
Bottom	7	31	57.6	11.63	669.888	2572.31	22.48	78.9048	160.933	80.08	748.793	2733.25
Bottom	8	31	47.35	5.64	267.054	646.581	0	0	0	47.35	267.054	646.581
Bottom	9	31	82.85	6.16	510.356	1292.63	0	0	0	82.85	510.356	1292.63
Bottom	10	31	102.1	6.15	627.915	1589.01	0	0	0	102.1	627.915	1589.01
Bottom	11	31	106.64	7.72	823.261	2377.2	21.53	85.9047	181.187	128.17	909.166	2558.38
Bottom	12	31	68.12	5.72	389.646	949.977	18.13	69.8005	145.703	86.25	459.447	1095.68
Bottom	13	31	94.11	6.36	598.54	1542.33	27.33	92.6261	188.67	121.44	691.166	1731
Bottom	14	31	92.43	6.64	613.735	1619.81	35.35	172.962	400.065	127.78	786.697	2019.88
Bottom	15	31
Bottom	16	31	93.9	7.22	677.958	1878.84	5.05	17.2205	34.9072	98.95	695.178	1913.74
Bottom	1	39					5.36	12.864	25.2724
Bottom	2	39	31.27	5.71	178.552	434.94	0	0	0	31.27	178.552	434.94
Bottom	3	39	74.98	5.43	407.141	967.939	0	0	0	74.98	407.141	967.939
Bottom	4	39	72.72	5.37	390.506	923.572	0	0	0	72.72	390.506	923.572
Bottom	5	39					0	0	0
Bottom	6	39					20.18	52.8716	103.889
Bottom	7	39	56.08	10.45	586.036	2078.6	26.78	113.364	244.219	82.86	699.4	2322.82
Bottom	8	39	48.9	5.51	269.439	645.03	0	0	0	48.9	269.439	645.03
Bottom	9	39	78.23	6.91	540.569	1459.71	20.93	60.6406	121.3	99.16	601.21	1581.01
Bottom	10	39	102.74	5.45	559.933	1333.5	0	0	0	102.74	559.933	1333.5
Bottom	11	39	100.41	8.85	888.628	2804.79	20.39	96.8525	217.194	120.8	985.481	3021.98
Bottom	12	39	63.95	6.2	396.49	1007.71	23.15	75.8709	154.107	87.1	472.361	1161.81
Bottom	13	39	97.11	6.65	645.782	1705.84	16.53	63.1446	131.524	113.64	708.926	1837.37
Bottom	14	39	96.26	7.01	674.783	1837.52	37.81	154.695	333.549	134.07	829.478	2171.07
Bottom	15	39	80.42	8.41	676.332	2063.35	0	0	0	80.42	676.332	2063.35
Bottom	16	39	93.86	7.49	703.011	1992.22	14.49	47.3035	95.0997	108.35	750.315	2087.32

## Sheet: GrowthMain.Feeding
Culture	Number	Time	Food	Height	Width	Width Top	Main_Branch_Volume
Bottom	1	0	No	27.21	5.44	2.5	352.215
Bottom	2	0	No	33.44	6.05	2.5	507.568
Bottom	3	0	Yes	77.99	5.31	2.5	974.357
Bottom	4	0	Yes	73.33	5.78	2.5	1038.76
Bottom	5	0	Yes	72.73	8.78	2.5	2004.76
Bottom	6	0	Yes	59.37	7.92	2.5	1379.85
Bottom	7	0	No	57.88	10.69	2.5	2231.29
Bottom	8	0	No	51.71	5.42	2.5	665.733
Bottom	9	0	No	94.71	6.71	2.5	1687.28
Bottom	10	0	No	107.79	5.6	2.5	1456.4
Bottom	11	0	Yes	104.4	8.08	2.5	2507.33
Bottom	12	0	No	68.27	6.23	2.5	1083.78
Bottom	13	0	Yes	102.14	6.51	2.5	1735.57
Bottom	14	0	Yes	99.86	5.85	2.5	1440.43
Bottom	15	0	Yes	84.47	9.23	2.5	2532.47
Bottom	16	0	No	97.32	7.03	2.5	1866.18
Bottom	1	5	No	28.77	5.92	2.5	422.516
Bottom	2	5	No	35.23	6.27	4.94	873.347
Bottom	3	5	Yes	69.22	4.85	2.5	759.256
Bottom	4	5	Yes	75.71	4.57	2.5	764.289
Bottom	5	5	Yes	78.38	5.08	2.5	918.394
Bottom	6	5	Yes	59.92	7.03	5.27	1792.11
Bottom	7	5	No	52.47	11.87	9.19	4594.05
Bottom	8	5	No	46.67	4.87	2.5	514.897
Bottom	9	5	No	83.74	6.49	2.5	1416.12
Bottom	10	5	No	102.2	6.09	2.5	1566.91
Bottom	11	5	Yes	105.04	7.52	2.5	2243.96
Bottom	12	5	No	61.88	6.6	2.5	1074.23
Bottom	13	5	Yes	101.64	6.46	2.5	1706.5
Bottom	14	5	Yes	82.65	7.55	2.5	1777.05
Bottom	15	5	Yes	82.91	8.13	2.5	2011.52
Bottom	16	5	No	90.06	7.33	2.5	1846.22
Bottom	1	10	No	28.45	6.26	2.5	454.992
Bottom	2	10	No	38.79	7.33	6.46	1450.29
Bottom	3	10	Yes	90.34	6.22	2.5	1430.61
Bottom	4	10	Yes	93.24	6.1	2.5	1433.12
Bottom	5	10	Yes	85.24	7.31	2.5	1739.76
Bottom	6	10	Yes	62.23	7.47	4.58	1808.22
Bottom	7	10	No	51.13	9.1	8.61	3149.59
Bottom	8	10	No	54.78	5.64	2.5	748.04
Bottom	9	10	No	90.46	6.83	2.5	1657.15
Bottom	10	10	No	112.39	6.39	2.5	1855.37
Bottom	11	10	Yes	121.57	6.86	2.5	2242.51
Bottom	12	10	No	75.85	6.96	2.5	1431.56
Bottom	13	10	Yes	120.77	6.8	2.5	2197.1
Bottom	14	10	Yes	103.06	7.24	2.5	2071.27
Bottom	15	10	Yes	109.06	7.76	2.5	2451.68
Bottom	16	10	No	100.88	8.46	2.5	2613.87
Bottom	1	14	No	32.18	6.06	2.5	489.674
Bottom	2	14	No	39.7	6.46	5.59	1133.83
Bottom	3	14	Yes	91.24	6.36	2.5	1495.29
Bottom	4	14	Yes	88.2	6.02	2.5	1328.65
Bottom	5	14	Yes	87.01	6.9	2.5	1619.83
Bottom	6	14	Yes
Bottom	7	14	No	53.26	12.17	8.83	4650.68
Bottom	8	14	No	53.19	5.26	2.5	655.421
Bottom	9	14	No	98.22	6.96	2.5	1853.76
Bottom	10	14	No	114.15	6.46	2.5	1916.53
Bottom	11	14	Yes	121.89	6.99	2.5	2316.24
Bottom	12	14	No	72.43	7.54	2.5	1553.98
Bottom	13	14	Yes	116.06	7.69	2.5	2570.86
Bottom	14	14	Yes	103.47	6.79	2.5	1878.01
Bottom	15	14	Yes	107.05	8.36	2.5	2719.6
Bottom	16	14	No	104.37	7.81	2.5	2370.93
Bottom	1	21	No	31.18	5.95	5.27	771.655
Bottom	2	21	No	39.47	6.3	4.26	874.972
Bottom	3	21	Yes	92.65	6.15	2.5	1441.94
Bottom	4	21	Yes	94.07	6.65	2.5	1652.44
Bottom	5	21	Yes	93.6	6.71	2.5	1667.5
Bottom	6	21	Yes	71.69	7.53	2.5	1534.8
Bottom	7	21	No	56.12	10.41	9.53	4384.09
Bottom	8	21	No	53.51	5.83	2.5	767.882
Bottom	9	21	No
Bottom	10	21	No	123.23	7.55	2.5	2649.56
Bottom	11	21	Yes	134.45	8.71	2.5	3656.78
Bottom	12	21	No	79.07	7.18	2.5	1568.11
Bottom	13	21	Yes	118.03	7.1	2.5	2299.28
Bottom	14	21	Yes	116.88	6.33	2.5	1901.55
Bottom	15	21	Yes	115.62	8.26	2.5	2879.44
Bottom	16	21	No	113.15	8.55	2.5	2983.81
Bottom	1	32	No	31.71	5.56	2.5	423.913
Bottom	2	32	No	39.77	9.25	8.34	2418.27
Bottom	3	32	Yes	104.33	6.62	2.5	1819.75
Bottom	4	32	Yes	97.68	6.2	2.5	1539.21
Bottom	5	32	Yes	96.63	7.53	2.5	2068.74
Bottom	6	32	Yes	75.52	8.48	5.27	2854.41
Bottom	7	32	No	58.34	11.95	9.53	5307.6
Bottom	8	32	No	57.54	5.47	2.5	750.875
Bottom	9	32	No	104.59	7.29	2.5	2125.33
Bottom	10	32	No	110.75	6.41	2.5	1837.17
Bottom	11	32	Yes	125.34	7.97	2.5	2943.28
Bottom	12	32	No	80.3	7.92	2.5	1866.3
Bottom	13	32	Yes	121.89	6.98	2.5	2310.99
Bottom	14	32	Yes	123.82	10.22	2.5	4416.63
Bottom	15	32	Yes	134.59	9.14	2.5	3968.92
Bottom	16	32	No	113.16	6.9	2.5	2106.65
Suspended	1	0	Yes	35.65	7.19	2.5	708.583
Suspended	2	0	Yes	35.81	4.42	2.5	345.343
Suspended	3	0	No	48.19	6.15	2.5	749.996
Suspended	4	0	No	42.65	6.25	2.5	680.413
Suspended	5	0	Yes	44.68	5.84	2.5	642.826
Suspended	6	0	Yes	40.65	5.43	2.5	524.763
Suspended	7	0	Yes	92.34	8.35	2.5	2341.25
Suspended	8	0	Yes	40.98	6.52	2.5	698.003
Suspended	9	0	Yes	63.56	6.56	2.5	1092.97
Suspended	10	0	Yes	79.15	5.46	2.5	1030.1
Suspended	11	0	No
Suspended	12	0	No
Suspended	13	0	No	80.49	6.8	2.5	1464.31
Suspended	14	0	No	41.23	7.13	2.5	808.598
Suspended	15	0	No	50.12	5.69	2.5	693.48
Suspended	16	0	No	65.64	8.59	2.5	1744.45
Suspended	1	5	Yes
Suspended	2	5	Yes	43.19	4.62	2.5	442.61
Suspended	3	5	No	56.73	6.75	2.5	1020.14
Suspended	4	5	No	54.33	5.58	2.5	730.186
Suspended	5	5	Yes
Suspended	6	5	Yes
Suspended	7	5	Yes	79.32	8.95	2.5	2257.83
Suspended	8	5	Yes	25.82	3.61	2.5	191.346
Suspended	9	5	Yes
Suspended	10	5	Yes
Suspended	11	5	No	61.95	6.55	2.5	1062.76
Suspended	12	5	No	95.62	7.93	2.5	2226.96
Suspended	13	5	No	84.22	7.7	2.5	1869.51
Suspended	14	5	No	44.65	7.39	2.5	927.399
Suspended	15	5	No	56.43	4.6	2.5	574.831
Suspended	16	5	No	79.24	8.16	2.5	1934.17
Suspended	1	10	Yes	40.52	7.31	2.5	827.02
Suspended	2	10	Yes	42.24	5.9	2.5	617.17
Suspended	3	10	No	51.41	7.44	2.5	1079.47
Suspended	4	10	No	55.43	5.63	2.5	754.918
Suspended	5	10	Yes	43.05	6.53	2.5	735.013
Suspended	6	10	Yes	48.05	4.87	2.5	530.122
Suspended	7	10	Yes	104.09	9.17	2.5	3086.52
Suspended	8	10	Yes	45.11	9.1	2.5	1320.45
Suspended	9	10	Yes	59.45	5.4	2.5	761.234
Suspended	10	10	Yes	72.13	7.71	2.5	1604.52
Suspended	11	10	No	58.76	6.55	2.5	1008.03
Suspended	12	10	No	107.93	7.43	2.5	2261.33
Suspended	13	10	No	91.03	6.62	2.5	1587.77
Suspended	14	10	No	49.41	6.7	2.5	878.192
Suspended	15	10	No	71.36	7.39	2.5	1482.18
Suspended	16	10	No	91.85	8.88	2.5	2580.27
Suspended	1	14	Yes	39.78	6.04	2.5	602.28
Suspended	2	14	Yes	39.75	4.69	2.5	415.96
Suspended	3	14	No	58.85	7.88	2.5	1356.49
Suspended	4	14	No	59.07	5.22	2.5	719.847
Suspended	5	14	Yes	57.71	9.11	2.5	1692.4
Suspended	6	14	Yes	49.78	7.48	2.5	1054.32
Suspended	7	14	Yes	104.54	8.12	2.5	2531.16
Suspended	8	14	Yes	50.07	5.87	2.5	725.962
Suspended	9	14	Yes	79.41	8.18	2.5	1946.15
Suspended	10	14	Yes	88.13	8.19	2.5	2164.21
Suspended	11	14	No	61.99	7.48	2.5	1312.93
Suspended	12	14	No	94.6	7.64	2.5	2073.42
Suspended	13	14	No
Suspended	14	14	No	48.59	7.32	2.5	993.909
Suspended	15	14	No	82.67	5.46	2.5	1075.91
Suspended	16	14	No	99.09	10.23	2.5	3540.47
Suspended	1	21	Yes	55.81	7.15	2.5	1099.44
Suspended	2	21	Yes	40.62	5.14	2.5	484.069
Suspended	3	21	No	66.25	8.46	2.5	1716.58
Suspended	4	21	No	64.18	6.27	2.5	1028.94
Suspended	5	21	Yes	58.5	7.56	2.5	1260.5
Suspended	6	21	Yes	48.69	6.73	2.5	871.486
Suspended	7	21	Yes	101.35	8.41	2.5	2600.35
Suspended	8	21	Yes
Suspended	9	21	Yes	62.09	7.67	2.5	1369.56
Suspended	10	21	Yes	80.36	6.94	2.5	1509.78
Suspended	11	21	No	74.37	7.89	2.5	1717.78
Suspended	12	21	No	114.56	7.42	2.5	2395.03
Suspended	13	21	No	75.54	4.89	2.5	838.261
Suspended	14	21	No	45.64	7.61	2.5	993.963
Suspended	15	21	No	63.7	6.93	2.5	1194.04
Suspended	16	21	No	99.97	9.43	2.5	3107.93
Suspended	1	32	Yes	55.15	8.23	2.5	1365.25
Suspended	2	32	Yes	48.99	6.17	2.5	766.248
Suspended	3	32	No	56.4	7.33	2.5	1156.2
Suspended	4	32	No	56.63	6.42	2.5	941.675
Suspended	5	32	Yes	55.35	6.44	2.5	924.842
Suspended	6	32	Yes	47.83	5.42	2.5	615.78
Suspended	7	32	Yes	117.08	8.23	2.5	2898.34
Suspended	8	32	Yes	44.07	7.83	2.5	1005.31
Suspended	9	32	Yes	80.36	6.83	2.5	1472.12
Suspended	10	32	Yes	89.1	7.02	2.5	1704.7
Suspended	11	32	No	73.44	8.29	2.5	1839.96
Suspended	12	32	No	100.57	8.09	2.5	2420.26
Suspended	13	32	No	87.3	7.91	2.5	2024.8
Suspended	14	32	No	41.41	7.4	2.5	861.977
Suspended	15	32	No	72.94	7.85	2.5	1670.82
Suspended	16	32	No

## Sheet: GrowthSecondary.Feeding
Culture	Time	Number	ID	Food	Height	Width	Width Top	Volume
Bottom	0	1	1a	No	6.09273	2.5	2.5	29.9076
Bottom	0	2	1b	No	5.66	2.15	2.5	24.0753
Bottom	0	3	1bb	No
Bottom	0	4	1c	No	3.96	2.88	2.5	22.543
Bottom	0	5	3a	Yes
Bottom	0	6	6a	Yes	7.24	2.58	2.5	36.6887
Bottom	0	7	6b	Yes	4.97	2.58	2.5	25.1854
Bottom	0	8	6c	Yes	22.38	2.51	2.5	110.298
Bottom	0	9	7a	No	5.81	3.54	2.5	42.0292
Bottom	0	10	7b	No	22.34	4.4	2.5	214.117
Bottom	0	11	9a	No	12.12	2.98	2.5	71.6478
Bottom	0	12	9b	No	10.67	3	2.5	63.5498
Bottom	0	13	11a	Yes	22.08	4.3	2.5	205.151
Bottom	0	14	12a	No	17.41	3.73	2.5	134.404
Bottom	0	15	12b	No	6.56	2.59	2.5	33.3745
Bottom	0	16	13a	Yes	17.73	4.3	2.5	164.734
Bottom	0	17	13b	Yes	10.64	3.31	2.5	70.9788
Bottom	0	18	14a	Yes	29.59	4.72	2.5	312.41
Bottom	0	19	14b	Yes	8.9	3.44	2.5	62.1732
Bottom	0	20	15a	Yes	11.58	2.74	2.5	62.4748
Bottom	0	21	15b	Yes	6.63	3.23	2.5	42.973
Bottom	0	22	15c	Yes	3.7	2.12	2.5	15.5415
Bottom	0	23	16a	No	9.76	3.41	2.5	67.4642
Bottom	0	24	16b	No	5.25	2.75	2.5	28.4339
Bottom	5	1	1a	No
Bottom	5	2	1b	No
Bottom	5	3	1bb	No
Bottom	5	4	1c	No
Bottom	5	5	3a	Yes
Bottom	5	6	6a	Yes	6.77	3.21	2.5	43.5636
Bottom	5	7	6b	Yes	3.5	3.23	2.5	22.6856
Bottom	5	8	6c	Yes	18.48	2.21	2.5	80.5976
Bottom	5	9	7a	No	5.5	3.23	2.5	35.6488
Bottom	5	10	7b	No	12.08	3.19	2.5	77.1694
Bottom	5	11	9a	No	11.32	2.54	2.5	56.4607
Bottom	5	12	9b	No	12.08	3.19	2.5	77.1694
Bottom	5	13	11a	Yes	22.16	3.63	2.5	165.353
Bottom	5	14	12a	No	18.04	4.51	2.5	178.832
Bottom	5	15	12b	No
Bottom	5	16	13a	Yes	13.15	2.39	2.5	61.7514
Bottom	5	17	13b	Yes	13.88	3.6	2.5	102.509
Bottom	5	18	14a	Yes	25.71	4.18	2.5	230.01
Bottom	5	19	14b	Yes
Bottom	5	20	15a	Yes	16.36	2.88	2.5	93.1321
Bottom	5	21	15b	Yes	5.29	3.35	2.5	35.7967
Bottom	5	22	15c	Yes
Bottom	5	23	16a	No	5.98	2.99	2.5	35.4836
Bottom	5	24	16b	No	5.94	2.99	2.5	35.2462
Bottom	10	1	1a	No
Bottom	10	2	1b	No	15.22	4.03	2.5	129.762
Bottom	10	3	1bb	No
Bottom	10	4	1c	No	10.59	4.79	2.5	114.139
Bottom	10	5	3a	Yes	3.4	2.72	2.5	18.2015
Bottom	10	6	6a	Yes	11.43	2.07	2.5	47.0098
Bottom	10	7	6b	Yes
Bottom	10	8	6c	Yes	21.43	3.52	2.5	153.951
Bottom	10	9	7a	No
Bottom	10	10	7b	No	19.89	4.04	2.5	170.127
Bottom	10	11	9a	No
Bottom	10	12	9b	No	12.4	2.96	2.5	72.7551
Bottom	10	13	11a	Yes	22.54	3.54	2.5	163.053
Bottom	10	14	12a	No	18.93	4.11	2.5	165.611
Bottom	10	15	12b	No
Bottom	10	16	13a	Yes
Bottom	10	17	13b	Yes	15.69	4.44	2.5	152.244
Bottom	10	18	14a	Yes	19.08	4.53	2.5	190.294
Bottom	10	19	14b	Yes	10.28	3.35	2.5	69.5633
Bottom	10	20	15a	Yes	26.42	3.41	2.5	182.623
Bottom	10	21	15b	Yes	8.44	3.34	2.5	56.9092
Bottom	10	22	15c	Yes
Bottom	10	23	16a	No	9.64	3.33	2.5	64.7692
Bottom	10	24	16b	No
Bottom	14	1	1a	No	6.8	2.67	2.5	35.7007
Bottom	14	2	1b	No	15.12	3.99	2.5	127.243
Bottom	14	3	1bb	No
Bottom	14	4	1c	No	11.87	4.06	2.5	102.188
Bottom	14	5	3a	Yes
Bottom	14	6	6a	Yes
Bottom	14	7	6b	Yes
Bottom	14	8	6c	Yes
Bottom	14	9	7a	No	7.49	3.18	2.5	47.6736
Bottom	14	10	7b	No	24.24	3.77	2.5	189.669
Bottom	14	11	9a	No	14.47	3.74	2.5	112.085
Bottom	14	12	9b	No	12.8	3.74	2.5	99.149
Bottom	14	13	11a	Yes	29	3.99	2.5	244.051
Bottom	14	14	12a	No	19.36	4.69	2.5	202.591
Bottom	14	15	12b	No	8.4	3.25	2.5	54.8404
Bottom	14	16	13a	Yes	18.3	3.34	2.5	123.393
Bottom	14	17	13b	Yes	16.79	3.35	2.5	113.616
Bottom	14	18	14a	Yes	33.8	6.27	2.5	541.883
Bottom	14	19	14b	Yes	11.46	3.63	2.5	85.512
Bottom	14	20	15a	Yes	26.98	4.28	2.5	249.113
Bottom	14	21	15b	Yes	10.55	3.51	2.5	75.5267
Bottom	14	22	15c	Yes
Bottom	14	23	16a	No
Bottom	14	24	16b	No
Bottom	21	1	1a	No	6.57	3.04	2.5	39.7181
Bottom	21	2	1b	No	15.24	3.79	2.5	120.05
Bottom	21	3	1bb	No
Bottom	21	4	1c	No	11.55	3.78	2.5	90.6784
Bottom	21	5	3a	Yes	3.7	2.86	2.5	20.9032
Bottom	21	6	6a	Yes	10.45	2.11	2.5	43.7102
Bottom	21	7	6b	Yes
Bottom	21	8	6c	Yes	26.26	2.86	2.5	148.357
Bottom	21	9	7a	No	25.46	3.93	2.5	210.093
Bottom	21	10	7b	No	5.05	3.58	2.5	37.0401
Bottom	21	11	9a	No
Bottom	21	12	9b	No
Bottom	21	13	11a	Yes	29.92	3.62	2.5	222.493
Bottom	21	14	12a	No	20.69	4.27	2.5	190.437
Bottom	21	15	12b	No	8.33	2.86	2.5	47.0606
Bottom	21	16	13a	Yes
Bottom	21	17	13b	Yes	21.23	3.29	2.5	140.612
Bottom	21	18	14a	Yes	35.13	4.49	2.5	346.13
Bottom	21	19	14b	Yes	11.12	2.49	2.5	54.3671
Bottom	21	20	15a	Yes	18.01	3.4	2.5	124.052
Bottom	21	21	15b	Yes	9.52	3.56	2.5	69.3456
Bottom	21	22	15c	Yes
Bottom	21	23	16a	No	9.14	3.28	2.5	60.3198
Bottom	21	24	16b	No	13.05	3.14	2.5	81.8575
Bottom	32	1	1a	No	6.82	3.31	2.5	45.4958
Bottom	32	2	1b	No	14.42	3.26	2.5	94.4829
Bottom	32	3	1bb	No
Bottom	32	4	1c	No	12.94	3.23	2.5	83.8719
Bottom	32	5	3a	Yes
Bottom	32	6	6a	Yes	13.8	3.26	2.5	90.4205
Bottom	32	7	6b	Yes	8.38	3.38	2.5	57.3138
Bottom	32	8	6c	Yes	28.81	3.93	2.5	237.737
Bottom	32	9	7a	No	7.31	2.43	2.5	34.8875
Bottom	32	10	7b	No	23.78	3.79	2.5	187.322
Bottom	32	11	9a	No	15.53	3.02	2.5	93.1885
Bottom	32	12	9b	No	14.98	3.7	2.5	114.476
Bottom	32	13	11a	Yes
Bottom	32	14	12a	No	22.49	3.99	2.5	189.266
Bottom	32	15	12b	No	8.15	3.78	2.5	63.9852
Bottom	32	16	13a	Yes	13.82	3.09	2.5	85.1082
Bottom	32	17	13b	Yes
Bottom	32	18	14a	Yes	40.48	5.31	2.5	505.731
Bottom	32	19	14b	Yes	15.68	4.23	2.5	142.517
Bottom	32	20	15a	Yes	25.57	3.13	2.5	159.804
Bottom	32	21	15b	Yes	10.37	3.3	2.5	68.9303
Bottom	32	22	15c	Yes
Bottom	32	23	16a	No
Bottom	32	24	16b	No
Suspended	1	0	1a	Yes	4.25	3.49	2.5	30.2141
Suspended	2	0	1b	Yes	8.71	3.2	2.5	55.8439
Suspended	3	0	4a	No	4.66	3.49	2.5	33.1288
Suspended	4	0	7a	Yes	34.76	4.13	2.5	306.055
Suspended	5	0	7aa	Yes	3.85	2.19	2.5	16.6521
Suspended	6	0	7b	Yes	3.74	3.67	2.5	28.2909
Suspended	7	0	8a	Yes	6.34	2.39	2.5	29.7721
Suspended	8	0	8b	Yes	18.31	3.24	2.5	119.108
Suspended	9	0	8c	Yes	1.96	2.19	2.5	8.47742
Suspended	10	0	9a	Yes	20.51	3.77	2.5	160.483
Suspended	11	0	9b	Yes	5.83	3.32	2.5	39.0309
Suspended	12	0	10a	Yes	4.11	3.34	2.5	27.7129
Suspended	13	0	10b	Yes	8.73	2.57	2.5	44.0644
Suspended	14	0	10c	Yes	4.17	2.7	2.5	22.1507
Suspended	15	0	10d	Yes	6.48	3.11	2.5	40.2012
Suspended	16	0	10e	Yes
Suspended	17	0	10f	Yes	9.26	2.65	2.5	48.2368
Suspended	18	0	12a	No	16.03	2.95	2.5	93.7006
Suspended	19	0	12b	No	21.23	3.18	2.5	135.128
Suspended	20	0	12c	No	19.52	3.4	2.5	134.453
Suspended	21	0	12d	No	19.52	3.4	2.5	134.453
Suspended	22	0	13a	No	7.49	3.95	2.5	62.2137
Suspended	23	0	13b	No	9.52	2.45	2.5	45.8028
Suspended	24	0	13c	No	5.85	2.69	2.5	30.9538
Suspended	25	0	16a	No	6.3	2.4	2.5	29.7045
Suspended	26	0	16b	No	5.44	2.4	2.5	25.6496
Suspended	27	0	16c	No	13.44	3.32	2.5	89.9786
Suspended	1	5	1a	Yes
Suspended	2	5	1b	Yes
Suspended	3	5	4a	No
Suspended	4	5	7a	Yes	36.23	4.19	2.5	325.156
Suspended	5	5	7aa	Yes	5.43	3.18	2.5	34.5618
Suspended	6	5	7b	Yes
Suspended	7	5	8a	Yes	6.54	2.72	2.5	35.0111
Suspended	8	5	8b	Yes	41	6.07	2.5	625.456
Suspended	9	5	8c	Yes
Suspended	10	5	9a	Yes
Suspended	11	5	9b	Yes
Suspended	12	5	10a	Yes
Suspended	13	5	10b	Yes
Suspended	14	5	10c	Yes
Suspended	15	5	10d	Yes
Suspended	16	5	10e	Yes
Suspended	17	5	10f	Yes
Suspended	18	5	12a	No
Suspended	19	5	12b	No
Suspended	20	5	12c	No
Suspended	21	5	12d	No
Suspended	22	5	13a	No	10.26	4.33	2.5	96.2252
Suspended	23	5	13b	No
Suspended	24	5	13c	No
Suspended	25	5	16a	No	9.73	3.8	2.5	76.9032
Suspended	26	5	16b	No	15.35	3.37	2.5	104.612
Suspended	27	5	16c	No	9.14	3.44	2.5	63.8498
Suspended	1	10	1a	Yes	6.58	6.15	2.5	102.407
Suspended	2	10	1b	Yes	8.73	3.79	2.5	68.7689
Suspended	3	10	4a	No	7.57	2.84	2.5	42.4419
Suspended	4	10	7a	Yes	37.41	4.76	2.5	399.666
Suspended	5	10	7aa	Yes	6.44	3.43	2.5	44.8303
Suspended	6	10	7b	Yes	5.76	3.84	2.5	46.1371
Suspended	7	10	8a	Yes	6.74	3.05	2.5	40.8973
Suspended	8	10	8b	Yes	29.03	3.82	2.5	230.983
Suspended	9	10	8c	Yes
Suspended	10	10	9a	Yes	20.54	3.94	2.5	170.051
Suspended	11	10	9b	Yes
Suspended	12	10	10a	Yes	5.7	3.41	2.5	39.4002
Suspended	13	10	10b	Yes	9.13	2.9	2.5	52.3699
Suspended	14	10	10c	Yes	13.71	3.1	2.5	84.7427
Suspended	15	10	10d	Yes
Suspended	16	10	10e	Yes
Suspended	17	10	10f	Yes
Suspended	18	10	12a	No	16.14	3.25	2.5	105.372
Suspended	19	10	12b	No	27.48	3.87	2.5	222.316
Suspended	20	10	12c	No	11.28	3.66	2.5	85.0362
Suspended	21	10	12d	No	19.92	3.73	2.5	153.781
Suspended	22	10	13a	No	9.55	3.86	2.5	77.0047
Suspended	23	10	13b	No	13.59	3.1	2.5	84.0009
Suspended	24	10	13c	No	9.75	3	2.5	58.0704
Suspended	25	10	16a	No	7.24	2.79	2.5	39.8212
Suspended	26	10	16b	No	7.64	2.78	2.5	41.8599
Suspended	27	10	16c	No	17.88	3.17	2.5	113.391
Suspended	1	14	1a	Yes
Suspended	2	14	1b	Yes
Suspended	3	14	4a	No	8.21	2.82	2.5	45.6793
Suspended	4	14	7a	Yes	43.99	6.13	2.5	681.226
Suspended	5	14	7aa	Yes	3.89	3.95	2.5	32.3113
Suspended	6	14	7b	Yes	4.53	4.71	2.5	47.686
Suspended	7	14	8a	Yes
Suspended	8	14	8b	Yes	31.07	3.23	2.5	201.383
Suspended	9	14	8c	Yes
Suspended	10	14	9a	Yes	22.97	4.74	2.5	243.955
Suspended	11	14	9b	Yes
Suspended	12	14	10a	Yes	13.54	4.36	2.5	128.177
Suspended	13	14	10b	Yes	8.22	3.07	2.5	50.2488
Suspended	14	14	10c	Yes	12.85	2.43	2.5	61.3276
Suspended	15	14	10d	Yes
Suspended	16	14	10e	Yes
Suspended	17	14	10f	Yes
Suspended	18	14	12a	No	16.43	3.28	2.5	108.431
Suspended	19	14	12b	No	21.63	3.51	2.5	154.848
Suspended	20	14	12c	No	13.85	3	2.5	82.4897
Suspended	21	14	12d	No	14.01	3.43	2.5	97.5267
Suspended	22	14	13a	No
Suspended	23	14	13b	No
Suspended	24	14	13c	No
Suspended	25	14	16a	No	16.25	4.21	2.5	146.767
Suspended	26	14	16b	No	19.45	3.22	2.5	125.611
Suspended	27	14	16c	No	12.18	3.21	2.5	78.3758
Suspended	1	21	1a	Yes	6.84	5.12	2.5	81.0553
Suspended	2	21	1b	Yes	13.77	3.97	2.5	115.128
Suspended	3	21	4a	No
Suspended	4	21	7a	Yes	49.76	4.98	2.5	566.686
Suspended	5	21	7aa	Yes	5.01	3.4	2.5	34.5086
Suspended	6	21	7b	Yes
Suspended	7	21	8a	Yes
Suspended	8	21	8b	Yes
Suspended	9	21	8c	Yes
Suspended	10	21	9a	Yes	18.93	4.36	2.5	179.202
Suspended	11	21	9b	Yes
Suspended	12	21	10a	Yes
Suspended	13	21	10b	Yes
Suspended	14	21	10c	Yes	11.88	3.8	2.5	93.8962
Suspended	15	21	10d	Yes
Suspended	16	21	10e	Yes
Suspended	17	21	10f	Yes
Suspended	18	21	12a	No	14.71	3.68	2.5	111.652
Suspended	19	21	12b	No	25.3	4.28	2.5	233.601
Suspended	20	21	12c	No	10.13	2.8	2.5	55.9313
Suspended	21	21	12d	No	16.99	4.07	2.5	146.738
Suspended	22	21	13a	No	9.13	4.37	2.5	86.6981
Suspended	23	21	13b	No	8.84	3.5	2.5	63.0649
Suspended	24	21	13c	No	12.99	2.55	2.5	65.0483
Suspended	25	21	16a	No	14.33	4.62	2.5	146.854
Suspended	26	21	16b	No	21.13	3.27	2.5	138.948
Suspended	27	21	16c	No
Suspended	1	32	1a	Yes	6.28	5.06	2.5	73.1684
Suspended	2	32	1b	Yes	15.39	4.47	2.5	150.712
Suspended	3	32	4a	No	6.92	3.21	2.5	44.5288
Suspended	4	32	7a	Yes	54.13	4.58	2.5	548.091
Suspended	5	32	7aa	Yes	4.01	3.12	2.5	24.9692
Suspended	6	32	7b	Yes	5.66	3.76	2.5	44.1388
Suspended	7	32	8a	Yes	10.98	2.46	2.5	53.0402
Suspended	8	32	8b	Yes	33.56	4.08	2.5	290.785
Suspended	9	32	8c	Yes
Suspended	10	32	9a	Yes	23.72	3.92	2.5	195.092
Suspended	11	32	9b	Yes
Suspended	12	32	10a	Yes	12.24	2.49	2.5	59.8429
Suspended	13	32	10b	Yes	10.02	3.23	2.5	64.9457
Suspended	14	32	10c	Yes	13.72	2.85	2.5	77.2166
Suspended	15	32	10d	Yes
Suspended	16	32	10e	Yes
Suspended	17	32	10f	Yes
Suspended	18	32	12a	No	17.36	3.77	2.5	135.836
Suspended	19	32	12b	No	24.34	3.77	2.5	190.452
Suspended	20	32	12c	No	11.87	3.7	2.5	90.7096
Suspended	21	32	12d	No	15.8	2.94	2.5	92.0091
Suspended	22	32	13a	No	11.91	2.97	2.5	70.1429
Suspended	23	32	13b	No
Suspended	24	32	13c	No
Suspended	25	32	16a	No	11.87	3.32	2.5	79.4677
Suspended	26	32	16b	No	21.29	3.18	2.5	135.51
Suspended	27	32	16c	No

## Sheet: Morphometrics
Number	Culture	Food	Polyp Number	Wet Weight	Dry Weight	Height	Volume
1	Bottom	no	82	1.15796	0.06117	65.1627	423.913
2	Bottom	no	52			39.77	2418.27
3	Bottom	yes	180	1.16784	0.07209	104.33	1819.75
4	Bottom	yes	150			97.68	1539.21
5	Bottom	yes	120	1.96779	0.108155	96.63	2068.74
6	Bottom	yes				126.51	2854.41
7	Bottom	no	182			89.43	5307.6
8	Bottom	no	88	0.9789	0.052465	57.54	750.875
9	Bottom	no	242	2.10941	0.12167	135.1	2125.33
10	Bottom	no	250	2.14661	0.12067	110.75	1837.17
11	Bottom	yes	240	3.29464	0.18106	155.26	2943.28
12	Bottom	no	194			110.94	1866.3
13	Bottom	yes	254			155.31	2310.99
14	Bottom	yes	254			179.98	4416.63
15	Bottom	yes		3.01808	0.173205	174.23	3968.92
16	Bottom	no				135.97	2106.65
1	Suspended	yes	190			76.82	647.763
2	Suspended	yes	128	0.31454	0.0183	48.99	2418.27
3	Suspended	no	156			56.4	1819.75
4	Suspended	no	122			63.55	1539.21
5	Suspended	yes	140			55.35	2068.74
6	Suspended	yes	128	0.46608	0.02321	47.83	3239.88
7	Suspended	yes	410	2.77361	0.12348	161.51	5563.75
8	Suspended	yes	192	0.77237	0.041175	90.57	750.875
9	Suspended	yes	200			109.91	2333
10	Suspended	yes	166			131.56	1837.17
11	Suspended	no	326	0.721345	0.050835	73.44	3165.77
12	Suspended	no				181.31	2119.55
13	Suspended	no		1.17826	0.085235	114.58	2616.42
14	Suspended	no		0.427545	0.031905	41.41	5064.88
15	Suspended	no		0.64628	0.04805	72.94	4213.2
16	Suspended	no				146.57	2255.97

## Sheet: EnergyContent
ID	Culture	Feed	Sample Energy
2	Suspended	yes	8.01535
6	Suspended	yes	7.92351
7	Suspended	yes	11.9614
8	Suspended	yes	11.888
11	Suspended	no	9.41935
13	Suspended	no	12.8154
14	Suspended	no	10.5887
15	Suspended	no	13.5915
1	Bottom	no	5.59985
3	Bottom	yes	7.96451
5	Bottom	yes	7.26433
8	Bottom	no	2.08519
9	Bottom	no	10.7778
10	Bottom	no	10.2768
11	Bottom	yes	8.02301
15	Bottom	yes	9.17538
